# Supplementary material for: Tailoring optical cross sections of gold nanorods at a target plasmonic resonance wavelength using bromosalicylic acid
Source: Royal Society of Chemistry journal article supplement (doi:10.1039/c9ra02106j), 2019-01-01
Supplement: c9ra02106j1.pdf [file c9ra02106j1.pdf]

## Supporting Information

### Tailoring optical cross sections of gold nanorods at a target plasmonic resonance wavelength using bromosalicylic acid

Weiwei Zou, Hao Xie, Yang Ye, Weihai Ni\*

School of Physical Science and Technology, Soochow University, Suzhou 215006, People's Republic of China  
E-mail: [niweihai@suda.edu.cn](mailto:niweihai@suda.edu.cn)

| BSA concentration (mM) | Length (nm) | Width (nm) | Aspect ratio |
|------------------------|-------------|------------|--------------|
| 0                      | 71.4 (6.5)  | 35.4 (2.3) | 2.03 (0.24)  |
| 0.2                    | 71.3 (6.6)  | 36.3 (2.7) | 1.98 (0.25)  |
| 0.5                    | 70.9 (5.2)  | 36.3 (2.7) | 1.96 (0.21)  |
| 1                      | 69.9 (6.6)  | 36.2 (3.5) | 1.96 (0.28)  |
| 2                      | 69.7 (6.8)  | 36.3 (3.2) | 1.93 (0.32)  |
| 5                      | 67.5 (5.3)  | 36.4 (3.8) | 1.88 (0.25)  |
| 10                     | 66.6 (6.2)  | 36.8 (2.7) | 1.81 (0.23)  |
| 15                     | 63.9 (7.7)  | 36.5 (3.4) | 1.78 (0.30)  |

**Table S1** Average length, width, and aspect ratio of the AuNRs after overgrowth with various BSA concentration.

| LSPR wavelength (nm) | BSA concentration (mM) | Volume ratio | Length (nm) | Width (nm) | Aspect ratio |
|----------------------|------------------------|--------------|-------------|------------|--------------|
| 690                  | 15                     | 0.8          | 60.3 (6.1)  | 23.4 (2.1) | 2.58 (0.28)  |
|                      | 4                      | 1.6          | 68.2 (5.7)  | 28.2 (2.0) | 2.42 (0.21)  |
|                      | 0                      | 3            | 76.1 (6.3)  | 33.0 (2.8) | 2.32 (0.28)  |
| 645                  | 15                     | 1.6          | 63.2 (6.5)  | 29.9 (3.3) | 2.14 (0.32)  |
|                      | 4.6                    | 3            | 73.0 (6.4)  | 35.4 (3.5) | 2.08 (0.26)  |
|                      | 0.2                    | 6            | 84.4 (5.7)  | 46.0 (3.4) | 1.84 (0.19)  |
| 620                  | 15                     | 3            | 63.7 (7.4)  | 35.7 (3.0) | 1.79 (0.24)  |
|                      | 2.7                    | 6            | 82.7 (7.2)  | 50.0 (2.7) | 1.66 (0.17)  |
|                      | 0.3                    | 10           | 91.6 (7.3)  | 60.6 (3.2) | 1.51 (0.15)  |

**Table S2** Combinations of BSA concentration in the reaction solution and the volume ratio of the growth solution to the seed solution used for AuNRs samples with ensemble LSPR wavelength at 620, 645, and 690 nm. Average length, width, and aspect ratio of AuNRs after overgrowth are shown.

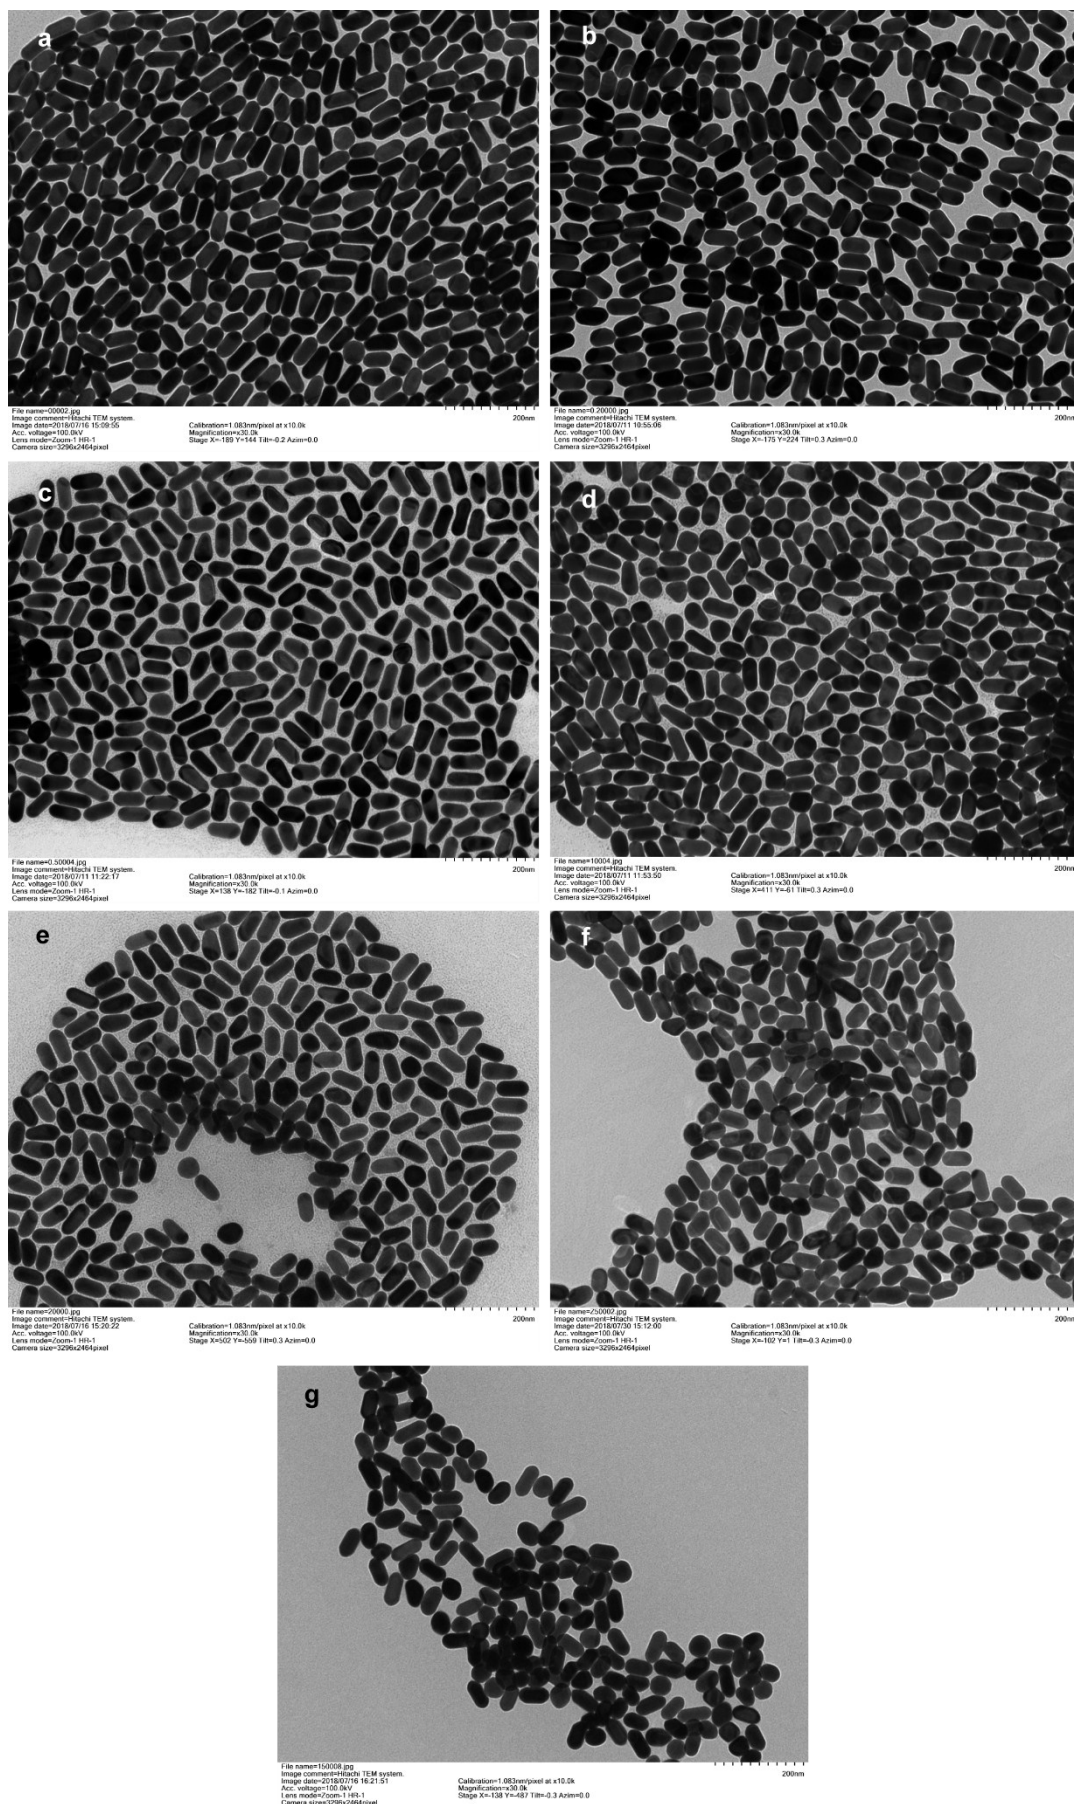

**Figure S1** (a-g) TEM images of AuNRs after overgrowth at BSA concentrations of 0, 0.2, 0.5, 1, 2, 5, and 15 mM, respectively.
